# Supplementary material for: Sorafenib suppresses extrahepatic metastasis de novo in hepatocellular carcinoma through inhibition of mesenchymal cancer stem cells characterized by the expression of CD90
Source: PubMed Central journal article supplement (PMC5596021; doi:10.1038/s41598-017-11848-z), 2017-09-12
Supplement: 41598_2017_11848_MOESM1_ESM.pdf [file 41598_2017_11848_MOESM1_ESM.pdf]

**Title:** Sorafenib suppresses extrahepatic metastasis *de novo* in hepatocellular carcinoma through inhibition of mesenchymal cancer stem cells characterized by the expression of CD90

Mariko Yoshida<sup>1</sup>, Taro Yamashita<sup>1,2\*</sup>, Hikari Okada<sup>1</sup>, Naoki Oishi<sup>1</sup>, Kouki Nio<sup>1</sup>, Takehiro Hayashi<sup>1</sup>, Yoshimoto Nomura<sup>1</sup>, Tomoyuki Hayashi<sup>1</sup>, Yoshiro Asahina<sup>1</sup>, Mika Ohwada<sup>1</sup>, Hajime Sunagozaka<sup>1</sup>, Hajime Takatori<sup>1</sup>, Federico Colombo<sup>3</sup>, Laura Porretti<sup>3</sup>, Masao Honda<sup>1</sup>, and Shuichi Kaneko<sup>1</sup>

## Supplementary Information

### Supplementary Figure Legends

**Supplementary Figure 1.** Effect of EpCAM/CD90 knockdown on cell proliferation. **A and B.** qRT-PCR analysis of *EPCAM* or *THY1* expression in HuH7 or HLF cells. Si-RNAs targeting control (SI03650318; QIAGEN), *EPCAM* (Silencer Select S 8370 and S8371; Ambion), or *THY1* (Silencer Select s14126 and s14127; Ambion) were transfected using Lipofectamine 2000. Gene expression was evaluated at 48 h after transfection in triplicate. **C and D.** Cell proliferation assay of HuH7 or HLF cells treated with si-RNAs. Cell density was measured at 72 h after transfection in quadruplicate.

**Supplementary Figure 2.** Tumorigenicity of Milano hcc-2. **A.** FACS analysis of Milano hcc-2 cells. Pure EpCAM<sup>+</sup> or CD90<sup>+</sup> cells were isolated using a BD FACSAriaII cell sorter, and greater than 98.5% purity was confirmed in isolated cells using FACSCalibur. These

cells were cultured for 30 days, and the expression of EpCAM and CD90 was evaluated using FACSCalibur. **B and C.** Tumorigenic capacity of  $5.0 \times 10^5$  EpCAM<sup>+</sup> Milano hcc-2 cells and  $5.0 \times 10^5$  unsorted Milano hcc-2 cells injected into a subcutaneous lesion. Sorted EpCAM<sup>+</sup> cells had higher tumorigenic capacity compared with the unsorted cells, but the difference did not reach statistical significance ( $P = 0.18$ ).

**Supplementary Fig. 3. A.** Chemosensitivity of sorted EpCAM<sup>+/-</sup> HuH7 cells to sorafenib. EpCAM<sup>+/-</sup> cells were isolated using a FACS Aria II cell sorter and incubated in 96-well plates overnight. The cells were then treated with 5  $\mu$ M sorafenib for 72 h and cell density was measured in quadruplicate. **B.** Chemosensitivity of Huh7 cells to sorafenib by *EPCAM* knockdown. Control or EpCAM-targeted si-RNAs were transfected in Huh7 cells and then treated with 2.5  $\mu$ M sorafenib for 48 h and cell density was measured in quintuplicate. **C.** Chemosensitivity of HLF cells to sorafenib by *Thy1* knockdown. Control or Thy1-targeted si-RNAs were transfected in HLF cells and then treated with 2.5  $\mu$ M sorafenib for 48 h and cell density was measured in quintuplicate.

**Supplementary Fig. 4.** Effect of sorafenib on Milano hcc-2. **A.** Tumorigenic capacity of  $5.0 \times 10^5$  Milano hcc-2 cells injected into a subcutaneous lesion and treated with vehicle or sorafenib. Sorafenib (30 mg/kg/day, 100  $\mu$ L/mice,  $n = 8$ ) or vehicle (100  $\mu$ L/mice,  $n = 8$ ) was orally administered 3 times per week at 30 days after injection for 2 weeks (day 30 to 44). **B.** Microscopic analysis of metastasis in the lung of NOD/SCID mice treated with vehicle or sorafenib. **C.** Frequency of lung metastasis in the lung of NOD/SCID mice treated with vehicle ( $n = 8$ ) or sorafenib ( $n = 8$ ).

**Supplementary Movie 1.** EpCAM<sup>+</sup> Huh7 cells (green) and CD90<sup>+</sup> HLF cells (red) was mixed well and dispersed equally in the well and co-cultured for 72 h using a CSU-X1 spinning disk (Yokogawa) and Andor iXon3 EMCCD camera system (Andor Technology). Images were analyzed by iQ Software (Andor Technology).

**Supplementary Movies 2 and 3.** A wound healing assay was performed to evaluate cell motility using  $\mu$ -Slide 8-well chambers. Cell motility of HuH7 cells (green) co-cultured with HLF cells (blue) treated with control (0.1% DMSO) (Supplementary Movie 1) or sorafenib (5  $\mu$ M) (Supplementary Movie 2) was monitored in real-time by time-lapse image analysis. The cells were cultured at 37°C in 5% CO<sub>2</sub> and time-lapse images were captured for 72 h using a CSU-X1 spinning disk (Yokogawa) and Andor iXon3 EMCCD camera system (Andor Technology). Images were analyzed by iQ Software (Andor Technology).

# Supplementary Fig. 1

**A**

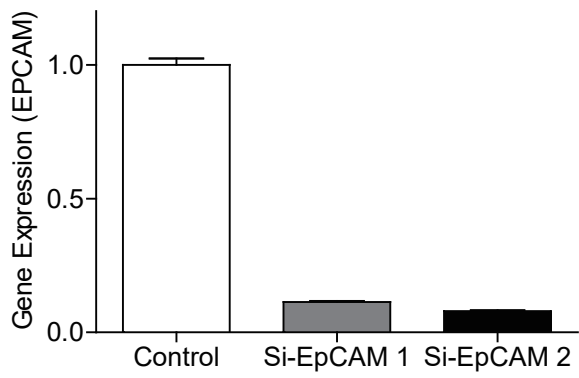

**B**

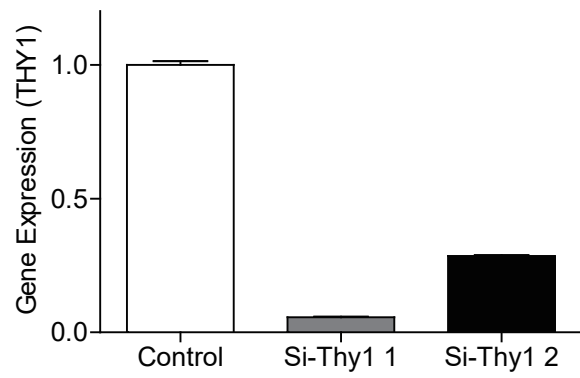

**C**

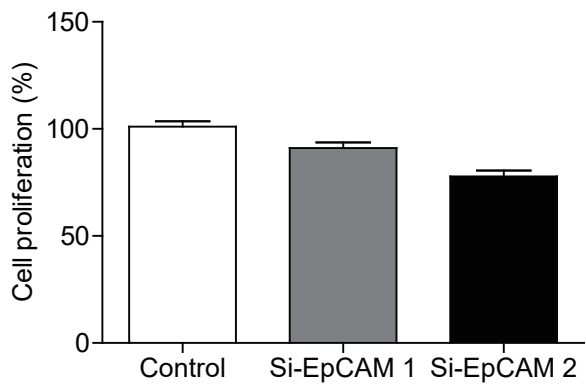

**D**

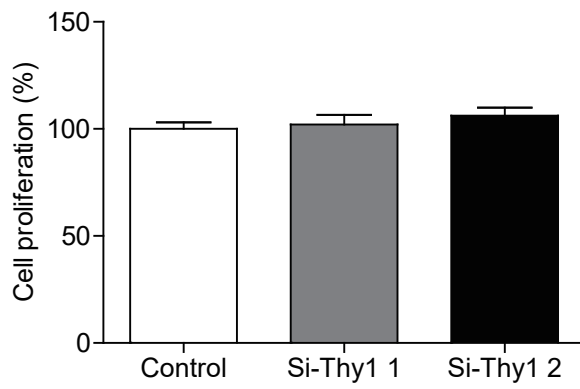

# Supplementary Fig. 2

A

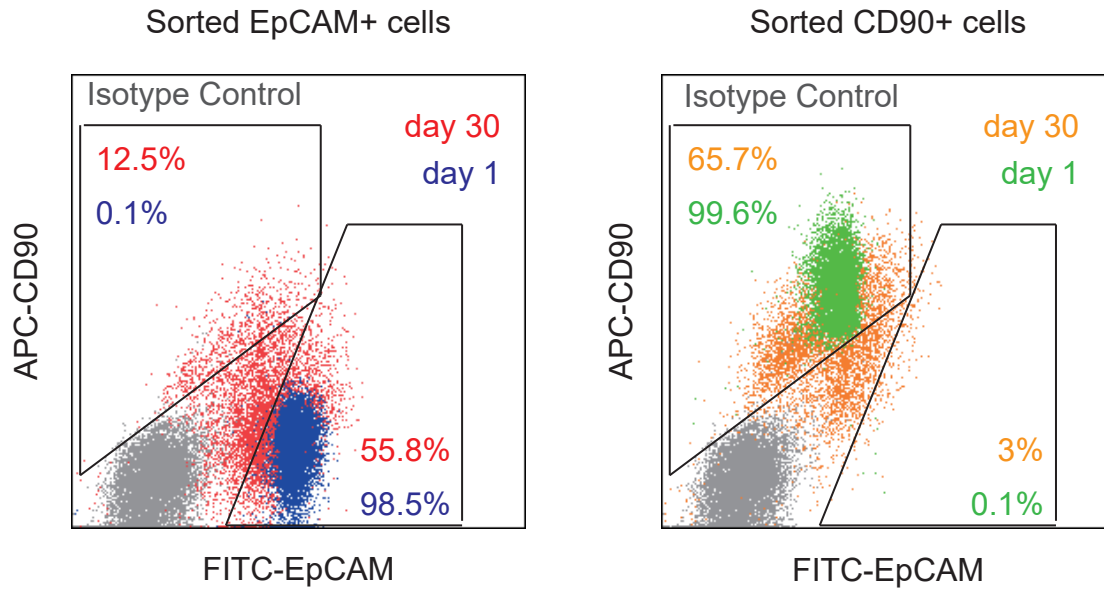

B

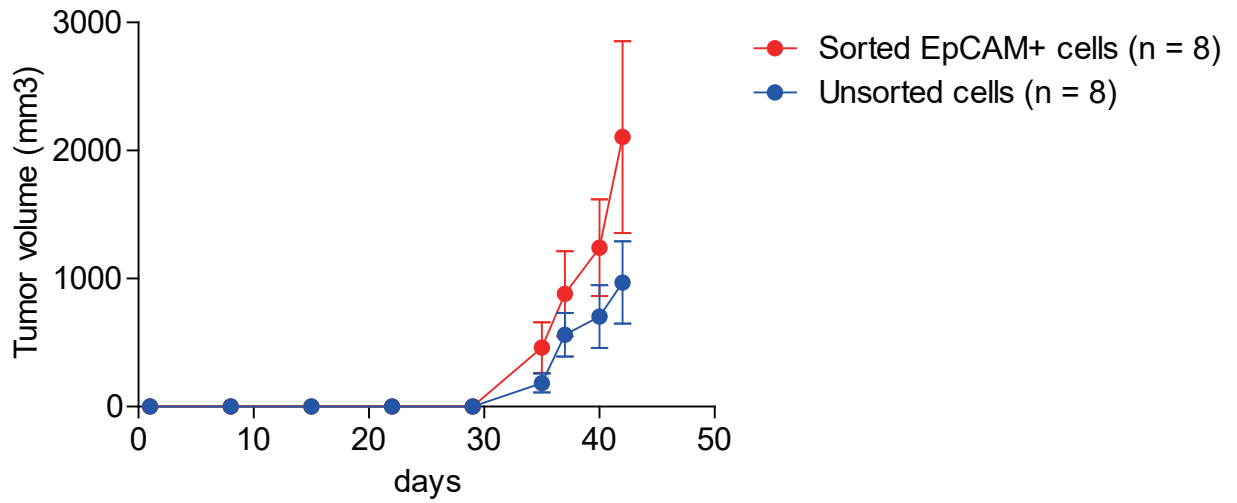

C

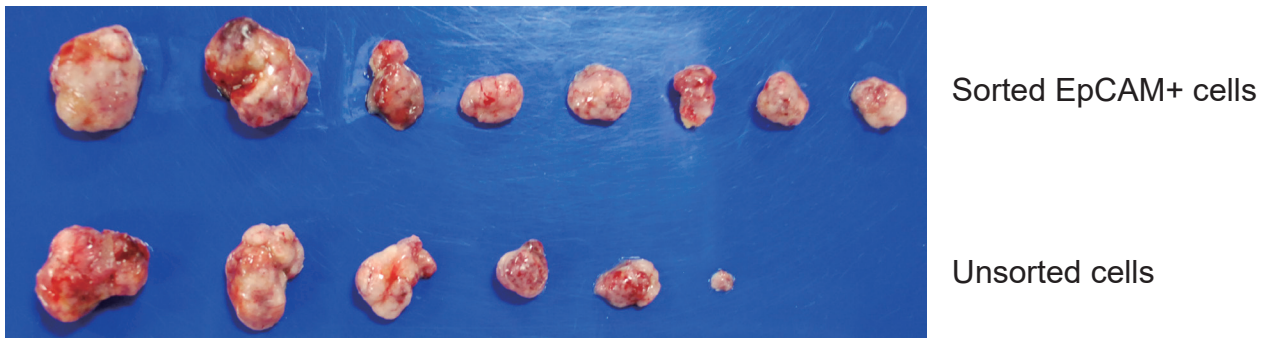

# Supplementary Fig. 3

## A

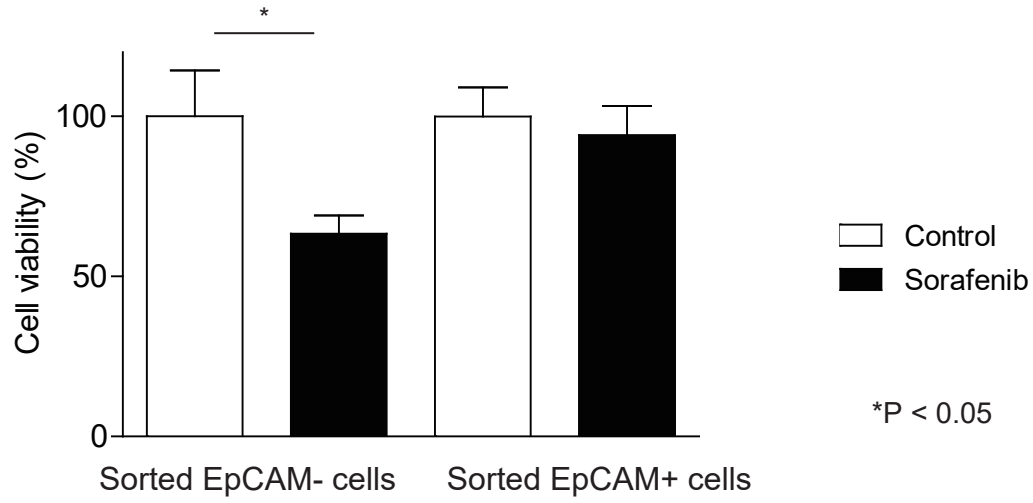

## B

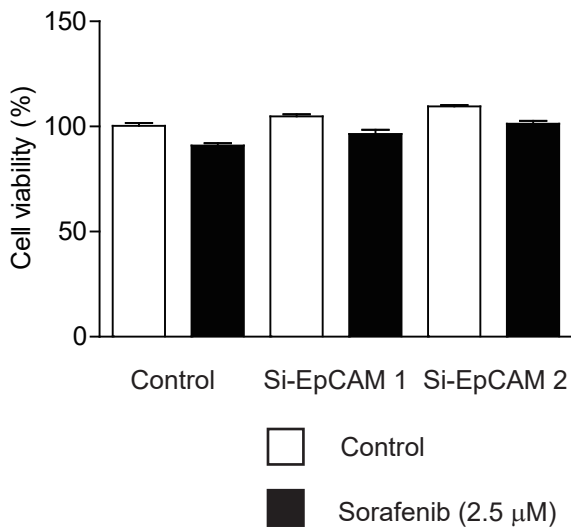

## C

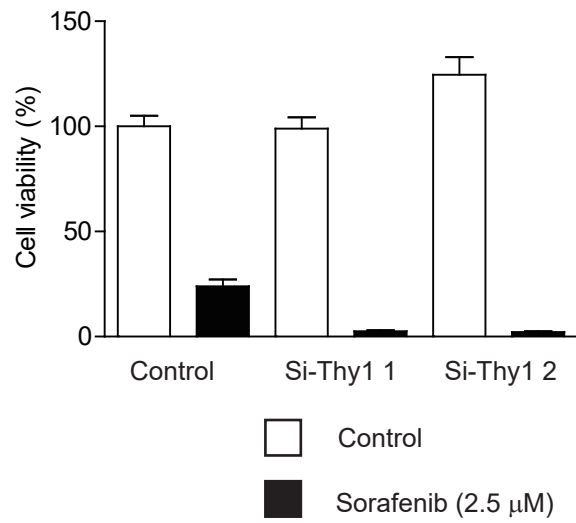

# Supplementary Fig. 4

A

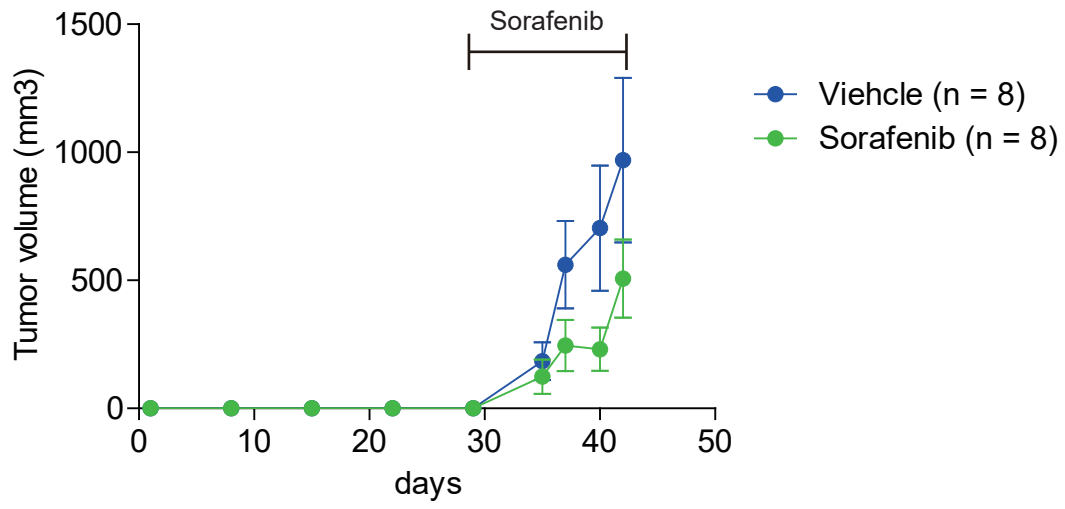

B

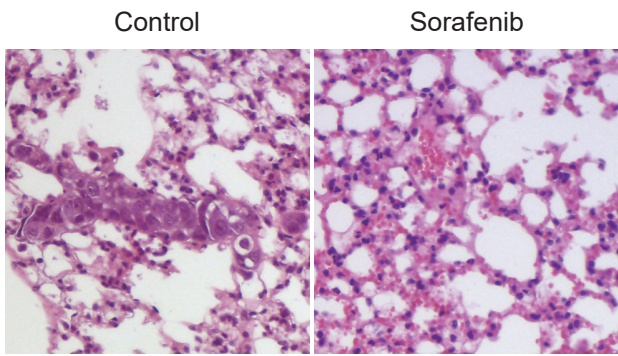

C

| Lung metastasis | Yes | No |
|-----------------|-----|----|
| Control         | 5   | 3  |
| Sorafenib       | 0   | 8  |

P = 0.025
